# Supplementary material for: Rising atmospheric CO2 leads to large impact of biology on Southern Ocean CO2 uptake via changes of the Revelle factor
Source: PubMed Central journal article supplement — Geophys Res Lett. 2015 Mar 6;42(5):1459–64. doi: 10.1002/2015GL063070 (PMC4459193; doi:10.1002/2015gl063070), 2015-03-06
Supplement: grl0042-1459-sd1.pdf [file grl0042-1459-sd1.pdf]

**Rising atmospheric CO<sub>2</sub> leads to large impact of biology on Southern Ocean CO<sub>2</sub> uptake via changes of the Revelle factor**

Judith Hauck and Christoph Völker

Alfred-Wegener-Institut, Helmholtz Zentrum für Polar- und Meeresforschung, Bremerhaven, Germany

**Contents of this file**

Text S1

**Additional Supporting Information (Files uploaded separately)**

none

**Introduction**

This text describes the steps performed for the extended multiple linear regression (eMLR) example calculation.

**Text S1.**

(1) For the eMLR a multi linear regression (MLR) for the reference year 2011 is calculated according to the equation:

$$\text{DIC}(2011) = a1 + b1 * \text{theta}(2011) + c1 * \text{alk}(2011) + d1 * \text{DIN}(2011)$$

where dissolved inorganic carbon (DIC, mmol/m<sup>3</sup>), potential temperature (theta, °C) alkalinity (alk, mmol/m<sup>3</sup>) and dissolved inorganic nitrogen (DIN, equivalent to nitrate + ammonium, mmol/m<sup>3</sup>) is model output for the year 2011 and all 12 months are used for the MLR. The coefficients a1, b1, c1 and d1 are the outcome of the regression.

(2) Then a second multiple linear regression is calculated for all years between 2012 and 2100 with the same variables and considering all 12 months of the respective year:

$$\text{DIC}(\text{year2}) = a2 + b2 * \text{theta}(\text{year2}) + c2 * \text{alk}(\text{year2}) + d2 * \text{DIN}(\text{year2})$$

(3) The accumulated anthropogenic carbon concentration for every year (i.e. year2=2012:2100) relative to the reference year 2011 is then calculated as

$$C\_ant(year2) = (a2-a1) + (b2-b1) * theta(year2) + (c2-c1) * alk(year2) + (d2-d1) * DIN(year2)$$

and the unit of C\_ant is mmol/m3.

(4) The inventory (mmol) of the 3D C\_ant field is calculated as

$$C\_ant\_int = \text{sum}(\text{sum}(\text{sum} ( C\_ant * \text{volume} ) ) )$$

For more details on the eMLR method see  
Friis et al 2005, doi:10.1016/j.dsr.2004.11.017 and  
Hauck et al., 2010, doi: 10.1029/2009JC005479
